# Supplementary material for: Development of Microstructural and Morphological Cortical Profiles in the Neonatal Brain
Source: bioRxiv or medRxiv preprint supplement (doi:10.1101/2020.01.14.906206), 2020-01-16
Supplement: Supplementary file [file media-1.pdf]

## Supplementary Material

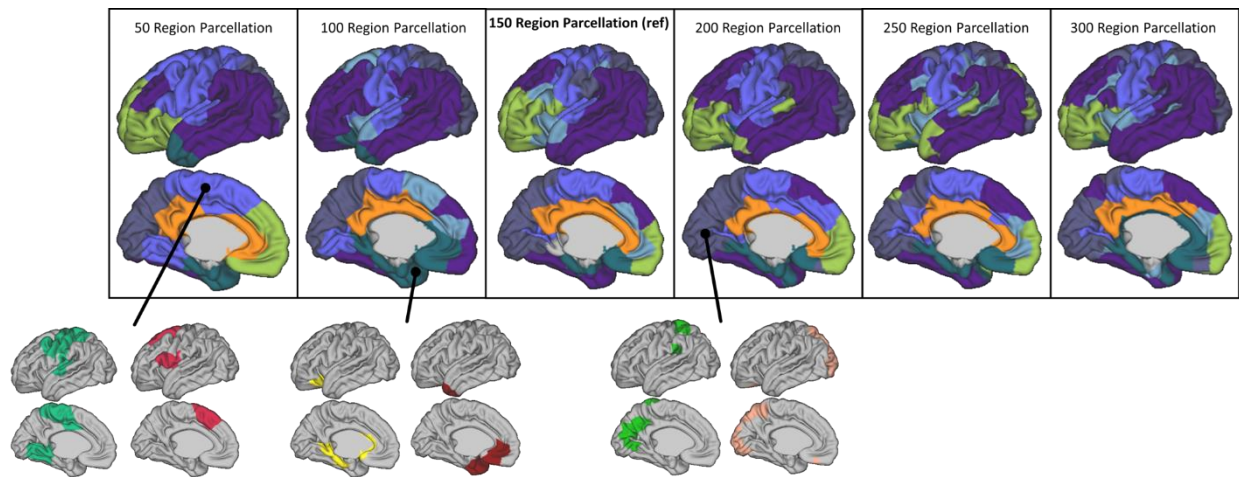

**Supplementary Figure 1:** Clustering with a fixed  $k=7$  across different parcellation densities. Colours are matched to the best overlap parcel in the  $n=150$  parcellation. In some cases two clusters match maximally to only one cluster in the  $n=150$  clustering solution. These are indicated in the bottom row.

**(a) Single Subject Cluster Consistency**  
(individual  $n=241$ )

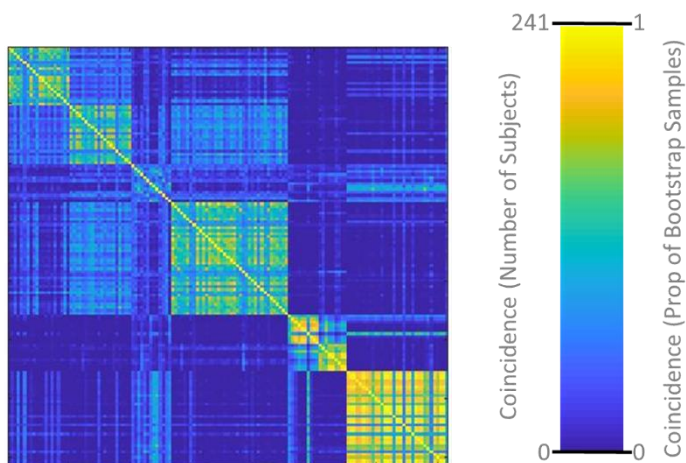

**(b) Bootstrapped Sample (sample  $n=20$ )**  
Cluster Consistency

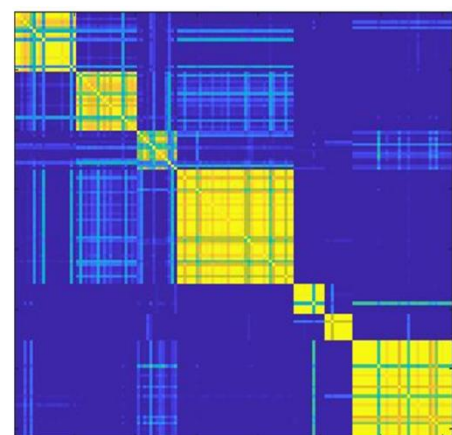

**Supplementary Figure 2:** Cluster repetition with a fixed ( $k=7$ ) clustering repeated for each individual (a) and for 500 bootstrap resamples of 20 subjects (b). Each element in the matrix indicates the count (a) or proportion (b) of times each node (row) was co-incident in a cluster solution with each other node (column).

Cluster solution based on age-  
correlation matrix

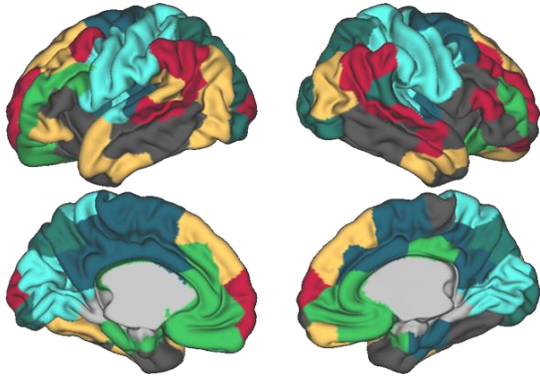

Cluster solution based on mean  
similarity matrix

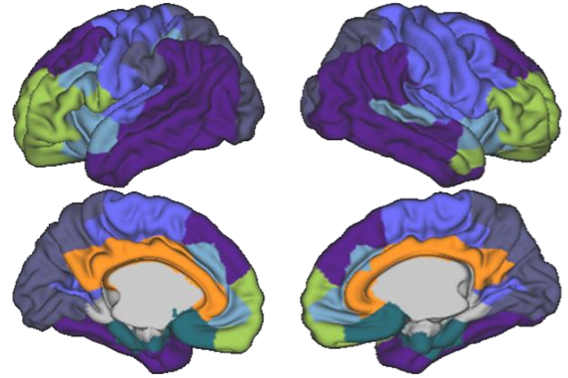

**Supplementary Figure 3:** Comparison of clusters derived from the mean MSN across subjects (a) and the correlation matrix of the MSN edges against PMA (b). Both have  $k$  fixed to 7.
